# Supplementary material for: Temporal assessment of entomological surveillance of Trypanosoma cruzi vectors in an endemic area of northeastern Brazil
Source: PLOS journal article supplement (doi:10.1371/journal.pone.0287260), 2023-06-15
Supplement: S1 (10.1371/journal.pone.0287260.s001) [file journal.pone.0287260.s001]

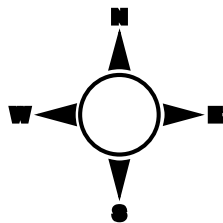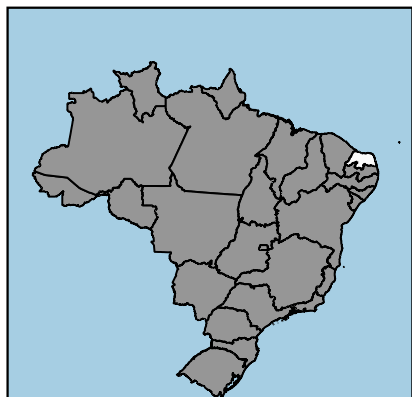

0 1,000 km

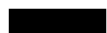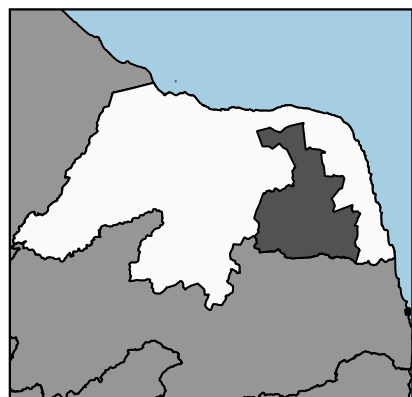

0 100 km

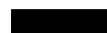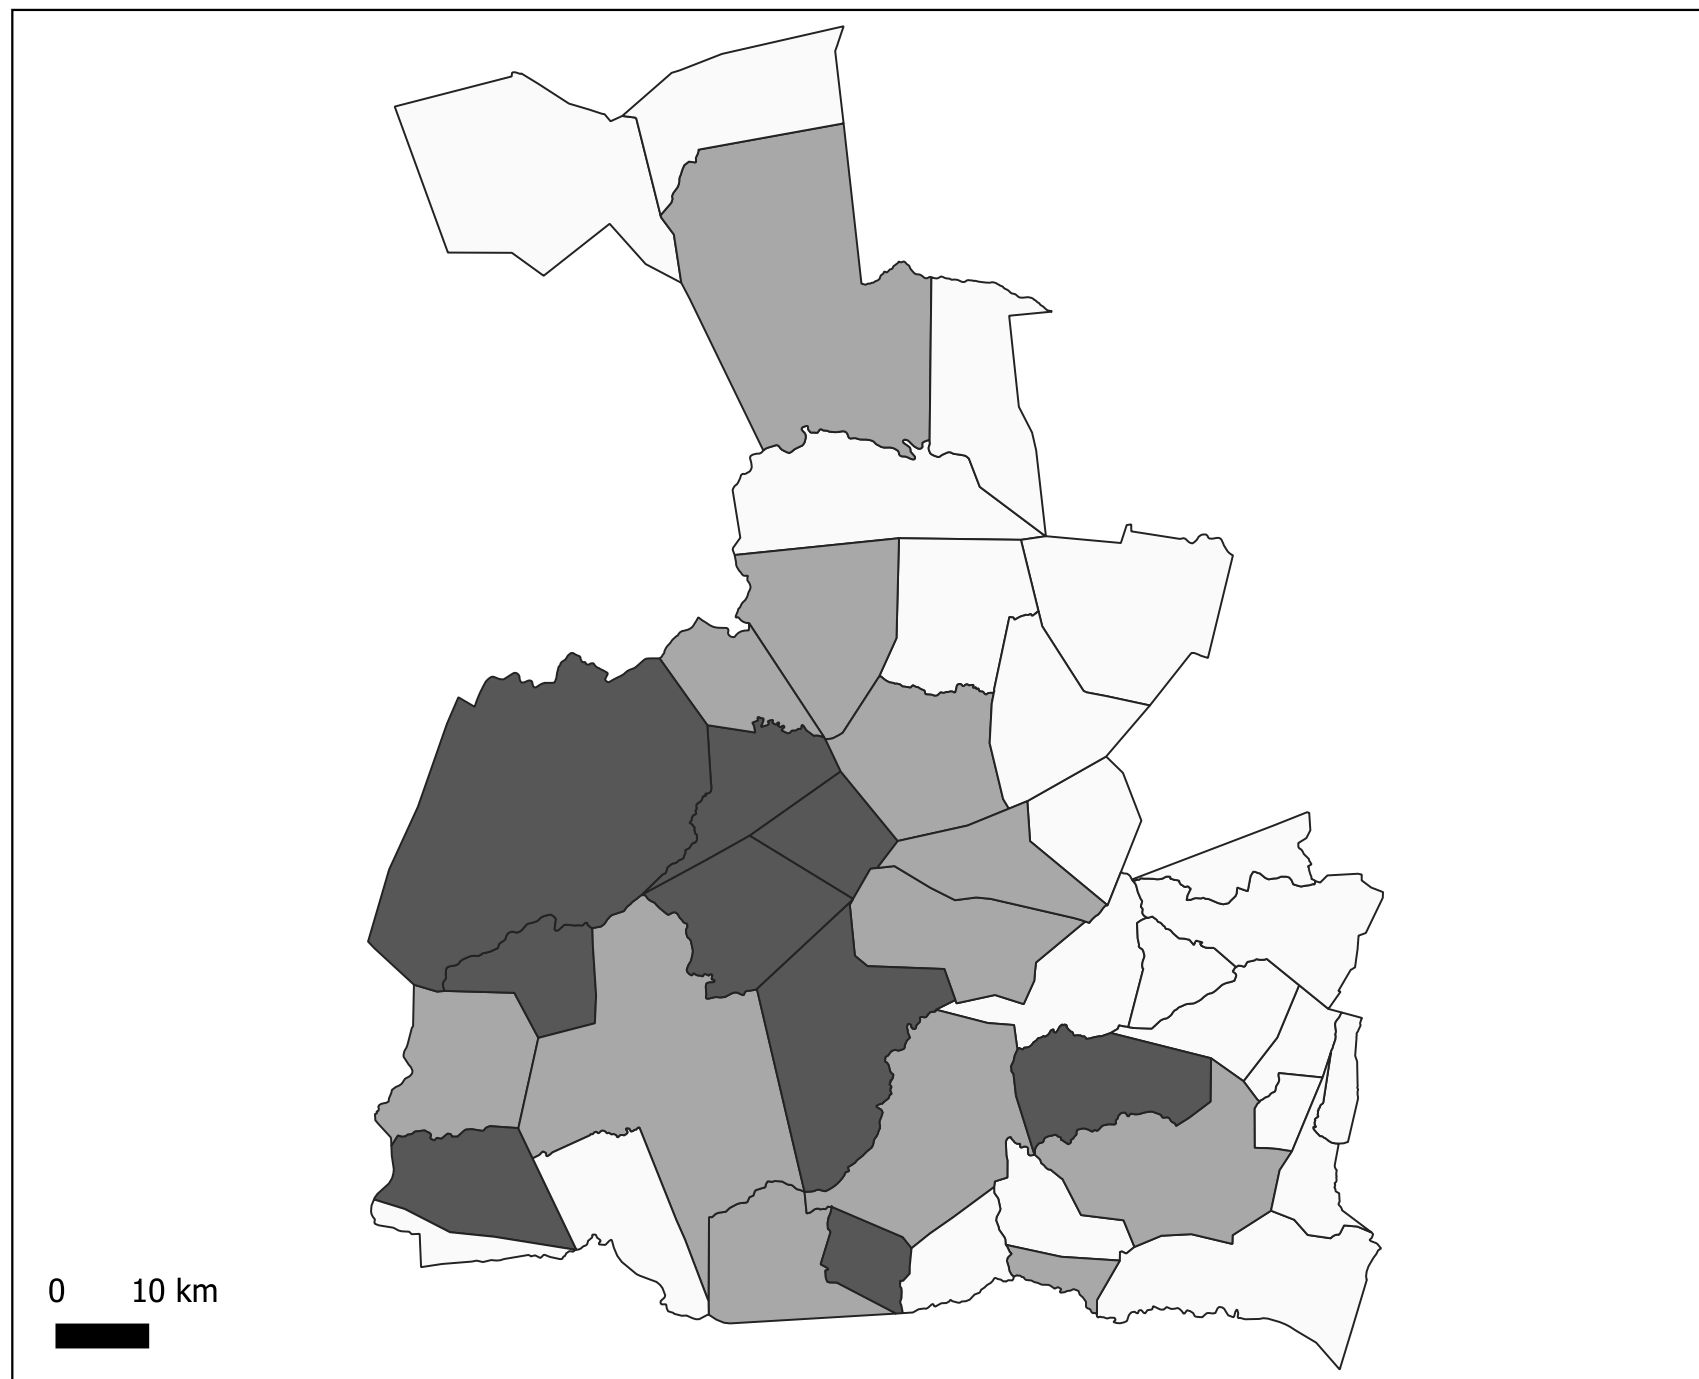

0 10 km

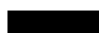

Risk of vectoral transmission

Low Medium High
